# Supplementary material
Source: publisher figshare collection journal article supplement (https://acs.figshare.com/ndownloader/files/4704757)
Supplement: Supplementary file 1 [file 4704757]

Figure legend for Supplemental Figure 1.

Residuals for the curve fits for complexes formed with ssDNA labeled on the 3'-end with 2AP. The fluorescence decay curve for complexes formed with the wild-type T4 DNA polymerase was monoexponential, but the decay curve for complexes formed with the D219A-DNA polymerase required two lifetime components to obtain a good fit. The lifetime values are reported in Table 1.
